# Supplementary material for: Organometal halide perovskite nanocrystals embedded in silicone resins with bright luminescence and ultrastability
Source: Royal Society of Chemistry journal article supplement (doi:10.1039/c7tc04055e), 2017-01-01
Supplement: c7tc04055e1.pdf [file c7tc04055e1.pdf]

## Supplementary Information for

### Organometal Halide Perovskite Nanocrystals Embedded in Silicone Resin with Bright Luminescence and Ultrastability

Hai Wang,<sup>a</sup> Hechun Lin,<sup>a,b\*</sup> Xianqing Piao,<sup>c</sup> Pei Tian,<sup>a</sup> Minjie Fang,<sup>a</sup> Xue'e An,<sup>a,d</sup> Chunhua Luo,<sup>a</sup> Ruijuan Qi,<sup>a</sup> Ye Chen<sup>a</sup> and Hui Peng<sup>a,b\*</sup>

<sup>a</sup> Key Laboratory of Polar Materials and Devices, Ministry of Education, Department of Electrical Engineering, East China Normal University, Shanghai, China

<sup>b</sup> Collaborative Innovation Center of Extreme Optics, Shanxi University, Taiyuan, Shanxi 030006, China

<sup>c</sup> Engineering Research Center for Nano photonics and advanced Instrument, East China Normal University, Shanghai, China

<sup>d</sup> Huaian Vocational College of Information Technology, Huaian, China

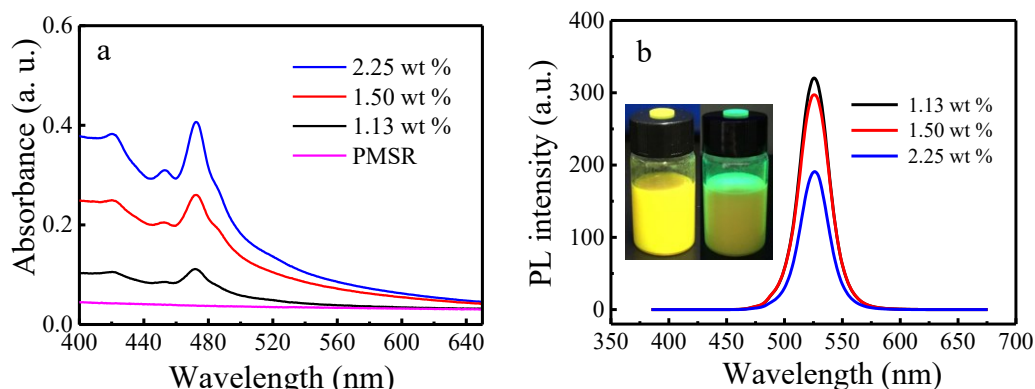

**Figure S1.** UV-vis absorption (a) and PL spectra of MaPbBr<sub>3</sub> / PMSR films prepared by using different weight ratios of MaPbBr<sub>3</sub> NCs and PMSR. Inset: Photograph of the mixture of MaPbBr<sub>3</sub> / PMSR under ambient light (left) and UV light of 365 nm (right).

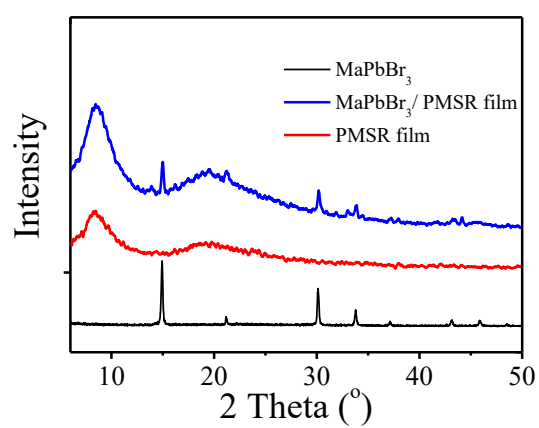

**Figure S2.** XRD patterns of MaPbBr<sub>3</sub>, PMSR and the MaPbBr<sub>3</sub> / PMSR film.

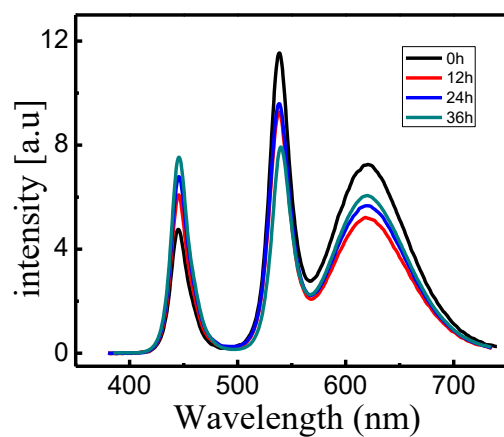

**Figure S3.** Evaluation of emission spectra of the white LED system with green MAPbBr<sub>3</sub> / PMSR and red nitride phosphor (Sr<sub>2</sub>Si<sub>5</sub>N<sub>8</sub>: Eu)-PMSR.
